# Supplementary material
Source: ML conference proceedings conference paper supplement (https://www.ecva.net/papers/eccv_2020/papers_ECCV/html/123730579_ECCV_2020_paper.php)
Supplement: Supplementary file 1 [file 123730579-supp.pdf]

301 Moved Permanently

# Moved Permanently

The document has moved here.

---

Apache/2.4.62 (Debian) Server at www.ecva.net Port 80
